# Supplementary material for: Design principles for LiFePO4 electrodes with improved recyclability
Source: Royal Society of Chemistry journal article supplement (doi:10.1039/d3gc03970f), 2023-01-01
Supplement: d3gc03970f1.pdf [file d3gc03970f1.pdf]

## Electronic Supplementary Information

### Design principles for $\text{LiFePO}_4$ electrodes with improved recyclability

Lechen Yang,<sup>a</sup> Dominika Gastol<sup>a</sup> and Emma Kendrick<sup>\*a</sup>

a. School of Metallurgy and Materials, The University of Birmingham, Edgbaston, Birmingham, B15 2SE, UK.

b. [E.kendrick@bham.ac.uk](mailto:E.kendrick@bham.ac.uk).

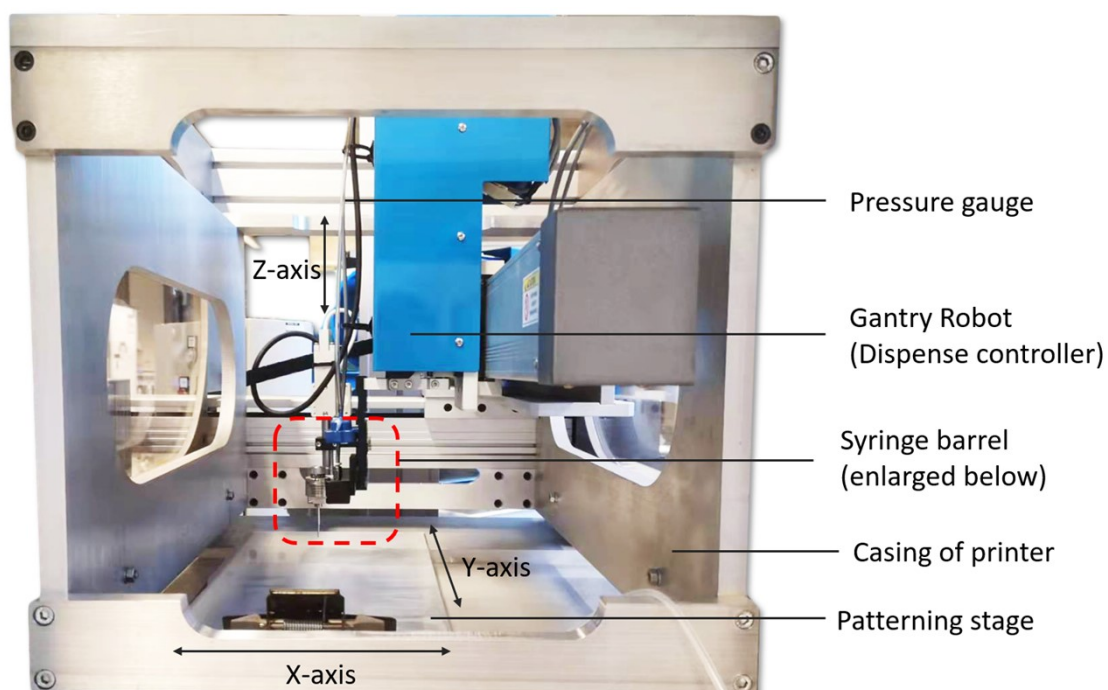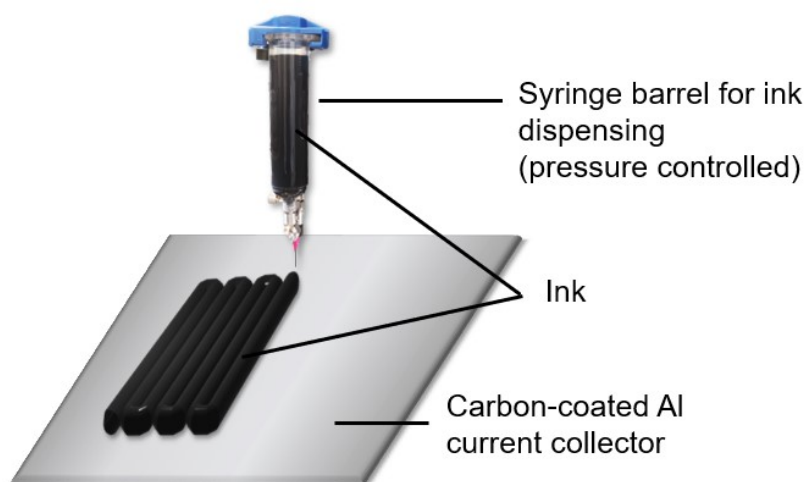

**Fig. S1.** Schematic diagram of the direct ink writing technique employed in this work. The figure on the top shows an overall view of the printer with process parameters explained in the main text, whereas the figure below shows an insight of the syringe barrel containing inks for the 3D printing process.

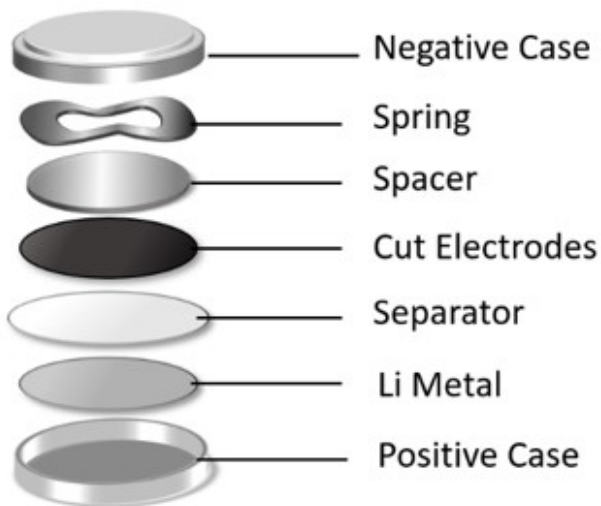

**Fig. S2.** Schematic diagram showing the construction of coin cells in this work.

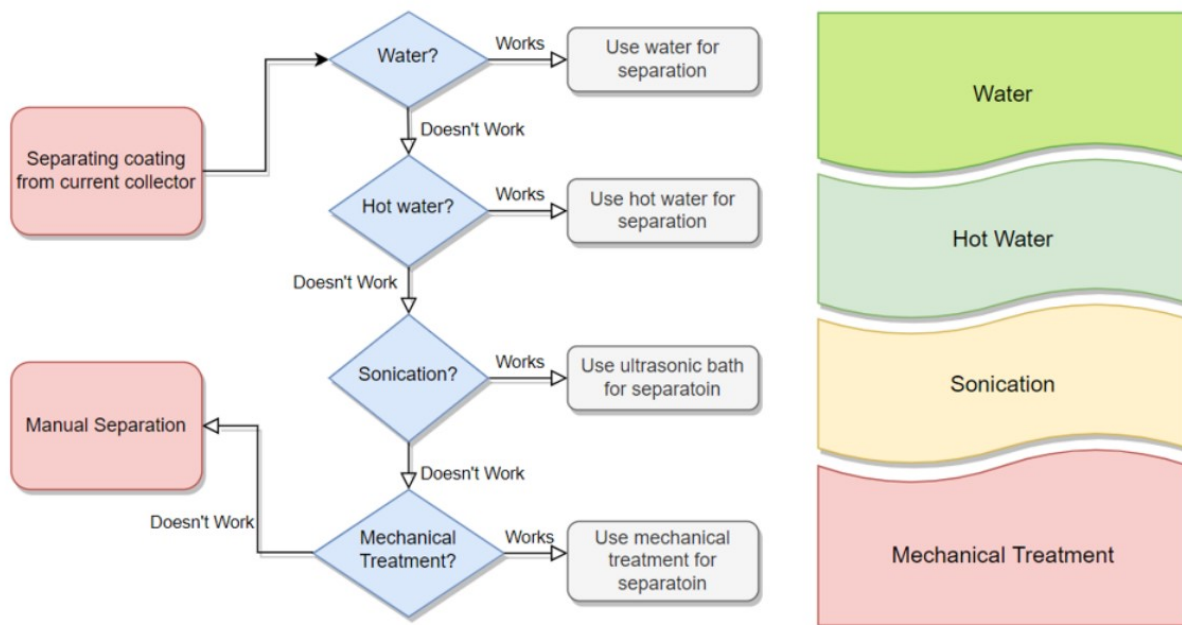

**Fig. S3.** Flow chart showing the suggested approaches used for electrode delamination for electrodes incorporating aqueous binders that were attempted, ranked from minimal energy requirement approaches (green) to energy intensive approaches (red).

**Table S1.** Criteria of ERADE assessment matrix.

|                           |                                                                       | <b>0 - 2 (Inclusive)</b>                                       | <b>3 - 5 (Inclusive)</b>                                                |
|---------------------------|-----------------------------------------------------------------------|----------------------------------------------------------------|-------------------------------------------------------------------------|
| <b>Material Range</b>     | Applicable to most types of materials?                                | No - certain types of materials are unavailable                | Yes - applicable to most types of materials, e.g. metals, ceramics      |
| <b>Ink Readiness</b>      | No requirement on further ink formulation?                            | Requirements on ink formulation                                | No or little requirement on ink formulation                             |
| <b>Design Versatility</b> | Ability to produce patterns/construct complex electrode architecture? | No                                                             | Yes                                                                     |
|                           | Ink Controllability; Electrode Resolution?                            | Little (no) ink controllability, low resolution                | Excellent ink controllability, high resolution                          |
| <b>Economic Viability</b> | Initial Cost of Setup                                                 | > £5,000 [1]                                                   | ≤ £5,000                                                                |
|                           | Energy consumption                                                    | > 1 kWh [1]                                                    | ≤ 1 kWh                                                                 |
| <b>Electrochemistry</b>   | Capacity and Rate compared to CMC/SBR DD electrodes (the reference)   | Capacity and rate have reduced more than 5% from the reference | Capacity and rate are within 5% difference from the reference or higher |
|                           | Tortuosity                                                            | Tortuosity for coatings higher than 1                          | Able to reach a tortuosity of 1 (eg. via channels)                      |
| <b>Recyclability</b>      | Separation efficiency via water immersion                             | < 90% within 5 min                                             | ≥ 90% within 5 min                                                      |
|                           | Recovery Rate of Active Material                                      | < 90%                                                          | ≥ 90%                                                                   |

**References:**

- [1] GV Series Automated Fluid Dispensing Robot | Gantry Robot | Nordson EFD n.d.  
<https://www.nordson.com/en/divisions/efd/products/automated-dispense-systems/gv-series-automated-dispensing-system> (accessed March 29, 2022).
